# Genetic analysis of 104 pregnancy phenotypes in 39,194 Chinese women

Han Xiao<sup>1\*</sup>, Linxuan Li<sup>2,3\*</sup>, Meng Yang<sup>1\*</sup>, Jingyu Zeng<sup>2,4</sup>, Jieqiong Zhou<sup>5</sup>, Ye Tao<sup>2</sup>, Yan Zhou<sup>5</sup>, Mingzhi Cai<sup>2</sup>, Jiuying Liu<sup>5</sup>, Yushan Huang<sup>2,3</sup>, Yuanyuan Zhong<sup>5</sup>, Panhong Liu<sup>2</sup>, Zhongqiang Cao<sup>1</sup>, Hong Mei<sup>1</sup>, Xiaonan Cai<sup>1</sup>, Liqin Hu<sup>1</sup>, Rui Zhou<sup>6</sup>, Xun Xu<sup>2,7</sup>, Huanming Yang<sup>2,3,8,9,10</sup>, Jian Wang<sup>11</sup>, Huanhuan Zhu<sup>2#</sup>, Aifen Zhou<sup>1,5#</sup>, Xin Jin<sup>2,12#</sup>

1. Institute of Maternal and Child Health, Wuhan Children's Hospital (Wuhan Maternal and Child Health care Hospital), Tongji Medical College, Huazhong University of Science and Technology, Wuhan, China.
2. BGI-Shenzhen, Shenzhen, China.
3. College of Life Sciences, University of Chinese Academy of Sciences, Beijing 100049, China.
4. College of Life Sciences, Northwest A&F University, Yangling, Shaanxi, China.
5. Department of Obstetrics, Wuhan Children's Hospital (Wuhan Maternal and Child Health care Hospital), Tongji Medical College, Huazhong University of Science and Technology, Wuhan, China.
6. BGI-Wuhan Clinical Laboratories, BGI-Shenzhen, Wuhan, China.
7. Guangdong Provincial Key Laboratory of Genome Read and Write, Shenzhen, China.
8. Guangdong Provincial Academician Workstation of BGI Synthetic Genomics, Shenzhen, China.
9. James D. Watson Institute of Genome Sciences, Hangzhou, China.
10. The Cancer Hospital of the University of Chinese Academy of Sciences (Zhejiang Cancer Hospital), Institute of Basic Medicine and Cancer (IBMC), Chinese Academy of Sciences, 16 Hangzhou, China.
11. BGI, BGI-Shenzhen, Shenzhen, China.
12. School of Medicine, South China University of Technology, Guangzhou, China.

\*These authors contributed equally.

#These authors are co-corresponding authors.

## Correspondence:

Xin Jin ([jinxin@genomics.cn](mailto:jinxin@genomics.cn))

Aifen Zhou ([april1972@163.com](mailto:april1972@163.com))

Huanhuan Zhu ([zhuhuanhuan1@genomics.cn](mailto:zhuhuanhuan1@genomics.cn))

NOTE: This preprint reports new research that has not been certified by peer review and should not be used to guide clinical practice.

1 **Abstract**

2 Maternity is a special period in a woman’s life that involves substantial physiological,  
3 psychological, and hormonal changes. These changes may cause alterations in many  
4 clinical measurements during pregnancy, which can be used to monitor and diagnose  
5 maternal disorders and adverse postnatal outcomes. Exploring the genetic background  
6 of these phenotypes is key to elucidating the pathogenesis of pregnancy disorders.

7 In this study, we conducted a large-scale molecular biology analysis of 104  
8 pregnancy phenotypes based on genotype data from 39,194 Chinese women. Genome-  
9 wide association analysis identified a total of 407 trait-locus associations, of which  
10 75.18% were previously reported. Among the 101 novel associations for 37 phenotypes,  
11 some were potentially pregnancy-specific and worth further experimental investigation.  
12 For example, *ESR1* with fasting glucose, hemoglobin, hematocrit, and several  
13 leukocytoses; *ZSCAN31* with blood urea nitrogen. We further performed pathway-  
14 based analysis and uncovered at least one significant pathway for 24 traits, in addition  
15 to previously known functional pathways, novel findings included birthweight with  
16 “Reactome signaling by NODAL”, twin pregnancy with “Reactome mitotic G1-G1/S  
17 phases”. The partitioning heritability analysis recapitulated known trait-relevant  
18 tissue/cell types, and also discovered interesting results including twin pregnancy with  
19 “embryoid bodies” cell-type enrichment, the delivery type cesarean section with  
20 “fallopian tube”, and birth weight with “ovary and embryonic stem cells”. In terms of  
21 both sample size and the variety of phenotypes, our work is one of the largest genetic  
22 studies of pregnancy phenotypes across all populations. We believe that this study will  
23 provide a valuable resource for exploring the genetic background of pregnancy  
24 phenotypes and also for further research on pregnancy-related diseases and adverse  
25 neonatal outcomes.

26

## 27 **Introduction**

28 The clinical phenotypes (e.g., serum and urinary test results) are commonly used for  
29 disease detection and diagnosis. Understanding their genetic architecture is key to  
30 elucidating disease etiology. Up until now, many genome-wide association studies  
31 (GWAS) have been performed to explore the genetic background of these phenotypes,  
32 including hematological<sup>1,2</sup>, liver-related<sup>3-5</sup>, kidney-related<sup>6,7</sup>, metabolic<sup>8,9</sup>, protein<sup>10,11</sup>,  
33 and urinary<sup>12,13</sup>. Many biobanks and consortiums also allow large-scale genetic analysis  
34 for a vast amount of clinical laboratory measurements, such as UK Biobank<sup>14</sup>, BioBank  
35 Japan Project (BBJ)<sup>11</sup>, FinnGen biobank<sup>15</sup>, and DIAGRAM consortium<sup>14</sup>.

36 The serum and urinary test results during pregnancy are critical for assessing  
37 maternal and fetal health status and predicting adverse postnatal outcomes<sup>16-18</sup>. For  
38 example, the high maternal glucose level is an indication of the risk of developing  
39 gestational diabetes<sup>19</sup>, and abnormal maternal hemoglobin levels may be a warning of  
40 preterm birth<sup>20,21</sup>. However, there are few studies investigating the genetic background  
41 of the laboratory features during pregnancy. The aforementioned studies and biobanks  
42 were typically designed for general adults, not the pregnant population. In recent years,  
43 non-invasive prenatal testing (NIPT) has become extensively used to provide pregnant  
44 women with a sensitive noninvasive screening option for chromosomal disorders of  
45 fetuses<sup>22</sup>. This technology detects whether the fetus has the three major chromosomal  
46 disorders while generating high-throughput maternal genotype data. Our team  
47 previously demonstrated that the NIPT sequencing data could be used for genetic  
48 studies, including variant calling, population history, viral infection patterns, and  
49 genome-wide association study<sup>23</sup>. We have proved that with highly accurate imputation  
50 performance for the low sequencing depth NIPT data, the GWAS analysis could  
51 maintain high statistical power in identifying trait-associated genetic variants.

52 In this study, based on the genotype data from 39,194 pregnant women who  
53 underwent the NIPT test, we investigated the genetic background of 104 pregnancy  
54 phenotypes, including maternal phenotypes (e.g., women's BMI, blood pressure),  
55 postnatal outcomes (e.g., birthweight, delivery option), and laboratory measurements  
56 (e.g., hematological, urinalysis, hormone, infection). The GWAS analysis identified

57 407 genome-wide significant associations involved with 66 phenotypes. The majority  
58 (75.18%) of these trait-locus associations were previously identified in either European  
59 or Asian populations, for example, the BMI with *FTO*, the C-reactive protein level with  
60 *CRP*, the serum bilirubin levels with the UDP Glucuronosyltransferase Family 1  
61 Members (e.g., *UGT1A6*). In addition to recapitulating known findings, we also  
62 discovered 101 novel trait-locus associations for 37 phenotypes, for example, thyroid  
63 hormone triiodothyronine (FT3) and *ABO*, urine glucose levels and *CDK12*, and total  
64 bile acid and *SLC39A9*. We also filled the gap of no GWAS results for some phenotypes  
65 in the GWAS Catalog, such as prealbumin (transthyretin), platelet-large cell ratio, and  
66 mucus in urine. Interestingly, we discovered some potentially pregnancy-specific  
67 associations, such as *ESR1* with fasting serum glucose, *ESR1* with several types of  
68 leukocytosis, *ZSCAN31* with blood urea nitrogen, and *ABCB4* with  $\gamma$ -glutamyl  
69 transferase. The functional enrichment and partitioning heritability analysis revealed  
70 inspiring results worthy of further exploration. To name one, for birthweight, the  
71 identified functional pathway is “Reactome signaling by NODAL” (regulating  
72 embryonic development) and the relevant cell types are ovary and embryonic stem cells.  
73 Our work is the first one to implement such a large genetic study of pregnancy  
74 phenotypes and all of the GWAS summary statistics results are publicly available for  
75 other researchers to use. These results will certainly provide a theoretical basis and  
76 reference for the study of genetic mechanisms of maternal disorders and postnatal  
77 outcomes.

78

## 79 **Results**

80 **Imputation performance of ultra-low coverage WGS data.** In our dataset, 39,194  
81 pregnant women took the NIPT test and had genotype data with an average of data  
82 volume 476 MB (sequencing depth was approximately 0.15X). We removed samples  
83 with sequencing depth less than 0.05X and mapping rate less than 90% and 38,668  
84 samples remained in further analysis. After genotype imputation in STITCH, there were  
85 8,134,302 genotyped SNPs with SNP density provided in [Figure 1a](#). The average  
86 imputation accuracy across all SNPs was 81.37% ([Figure 1b](#)). In addition, if we focused  
87 on only well-imputed SNPs with info-score > 0.4, Hardy-Weinberg equilibrium (HWE)  
88 p-value > 1e-6, and minor allele frequency (MAF) > 0.05, the mean imputation  
89 accuracy was 90.46% ([Figure 1b](#)). The number of samples who took the folate  
90 metabolism ability genetic test was 272. The averaged correlation of imputed and true  
91 genotypes of three tested variants in genes *MTHFR* and *MTRR* was 0.71 and the  
92 maximum value was 0.90 ([Figure 1c](#)). These results ensured the high quality and  
93 accuracy of imputed genotype data.

94

95 **Genome-wide association analysis of 104 pregnancy traits.** We performed GWAS  
96 analysis on 104 traits, each with an effective sample size of over 2,000 ([Supplementary](#)  
97 [Figure S1](#)). These traits covered a wide range of clinical measurements, grouped into  
98 11 different categories ([Supplementary Figure S1, Table 1](#)): maternal (n=5), postnatal  
99 (n=6), electrolyte (n=4), hematological (n=24), hormone (n=4), infection (n=14),  
100 kidney-related (n=4), liver-related (n=8), metabolism (n=6), protein (n=5), and  
101 urinalysis (n=24). To have a better visualization of trait distribution and pairwise  
102 association, we provided a convoluted figure for displaying the frequency of  
103 quantitative traits (histogram), the category of binary traits (bar plot), the relationship  
104 between two quantitative traits (scatter chart), one quantitative trait and one binary trait  
105 (box plot), two binary traits (2\*2 contingency table), and the results of statistical  
106 inference for testing the corresponding correlations ([Supplementary Figure S2](#)). The  
107 chromosome-based Circos plot presenting the GWAS results of phenotypes with  
108 significant signals was provided in [Figure 2a](#). The genomic inflation factors ( $\lambda_{gc}$ ) for

109 estimating the amount of GWAS test statistics inflation were presented in bar plots  
110 (Figure 2b). The  $\lambda_{gc}$ 's of all phenotypes were around 1, meaning no evidence of inflation  
111 and the GWAS results were reasonable. The individual Manhattan plots were provided  
112 in Supplementary Figure S3. For known and novel loci, we colored blank and red,  
113 respectively.

114 At the genome-wide significance threshold of  $5e-08$ , we identified 407 trait-locus  
115 associations involved with 66 traits (Table 1, Supplementary Table S1), the vast  
116 majority (75.18%) of which were previously reported and biologically related. For  
117 example, the fat mass- and obesity-associated (*FTO*) gene with the women's BMI, C-  
118 reactive protein and its encoded gene *CRP*, calcium (Ca) and gene *CASR* (Calcium  
119 Sensing Receptor), the total/direct bilirubin and the members of UDP  
120 glucuronosyltransferase Family 1 (e.g., *UGT1A6*, *UGT1A8*), the vitamin D level and its  
121 associated gene *GC* (GC Vitamin D Binding Protein), etc. In addition, 101 trait-locus  
122 associations involved with 37 traits were identified for the first time, for example, the  
123 novel locus for blood urea nitrogen is *IGF1*, insulin-like growth factor 1, whose  
124 encoded protein is similar to insulin in function and structure and involved in mediating  
125 growth and development<sup>24</sup>.

126 When we considered the study-wide significance threshold of  $4.81e-10$  ( $=5e-$   
127  $8/104$ ), 272 trait-locus associations involved with 56 traits were still significant. Among  
128 them, 205 (75.37%) were previously reported and 67 associations were novel. To name  
129 a couple of novel ones: the gene *ABO* is associated with free triiodothyronine (p-value=  
130  $2.69e-31$ ) and is previously reported to be associated with thyroid stimulating hormone  
131 measurement<sup>25</sup>; *FBXL20* is associated with urinary glucose and is formerly identified  
132 to play a role in kidney function<sup>7,26</sup>; *SLCO1B3* is associated with urobilinogen,  
133 *SLCO1B3* encodes a transmembrane receptor that plays a role in bile acid and bilirubin  
134 transport<sup>24</sup>; *BIN2* is associated with platelet size deviation width, previous GWAS  
135 studies have linked it with platelet count<sup>27,28</sup>; *JMJD1C* is associated with aspartate  
136 aminotransferase, it was identified to be associated with liver fibrosis measurement<sup>29</sup>,  
137 liver volume<sup>30</sup>, and liver enzyme<sup>31</sup>.

138 In addition, we added phenotypes currently not documented in the GWAS catalog

139 and identified their associated variants, such as platelet larger cell ratio (P-LCR), red  
140 cell distribution width-standard deviation (RDW-SD), red cell distribution width-  
141 coefficient of variation (RDW-CV), mucus in urine, and prealbumin, etc. Among them,  
142 P-LCR had the maximum number of associated loci (n=26), including *PEAR1*, *TEC*,  
143 *STK38*, *CD36*, *JMJD1C*, *BIN2*, etc. All these genes were previously identified to be  
144 associated with platelet count and mean platelet volume<sup>32,33</sup>. In detail, *PEAR1* is a type  
145 of platelet receptor, *CD36* encodes a protein that is a major glycoprotein on the platelet  
146 surface and acts as a receptor for platelet-responsive proteins<sup>24</sup>. We identified nine loci  
147 associated with RDW-SD, including *CCT3*, *SLC12A2*, *ADGRF5*, *ABO*, *CNNM2*, *PRC1*,  
148 and *SLC14A1*, which have been previously reported to be associated with RDW<sup>27,32</sup>.  
149 We identified seven prealbumin-related loci, including *TTR*, *GCKR*, *HGFAC*, *HNF1A*,  
150 and *LINC01229*, in which *TTR* encodes a transthyretin protein, a type of prealbumin,  
151 and transports thyroid hormones in plasma and cerebrospinal fluid, and *HNF1A*  
152 encodes a protein that is a transcription factor required for the expression of several  
153 liver-specific genes and an albumin proximal factor<sup>24</sup>. Mucus in urine is associated with  
154 *UMOD* (p-value = 1.28e-17), which was previously identified to be associated with  
155 urinary uromodulin in the European population<sup>34</sup> and its encoded protein was most  
156 abundant in mammalian urine.

157 We also discovered some potentially pregnancy-specific associations. In detail,  
158 *ESR1* with fasting serum glucose, hemoglobin, hematocrit, and several types of  
159 leukocytosis (white blood cell, neutrophils, lymphocytes). The protein encoded by  
160 *ESR1* (Estrogen Receptor 1) regulates the transcription of many genes that play a role  
161 in gestation, metabolism, sexual development, growth, and other reproductive  
162 functions<sup>24</sup>. We suspect that, during the special pregnancy period, significant changes  
163 in hormonal levels have highlighted the associations between *ESR1* and pregnancy  
164 phenotypes. For blood urea nitrogen, we found a novel gene *ZSCAN31*, which encodes  
165 a protein containing multiple zinc finger motifs and may be involved in the  
166 development of multiple embryonic organs<sup>35</sup>. We also identified the novel association  
167 between *ABCB4* with  $\gamma$ -glutamyl transferase. The protein encoded by *ABCB4* is a  
168 member of the superfamily of ATP-binding cassette transporters and may involve the



169 transport of phospholipids from the liver into bile. A previous study demonstrated that  
170 the splicing mutations in *ABCB4* can cause intrahepatic cholestasis of pregnancy in  
171 women with high  $\gamma$ -glutamyl transferase<sup>36</sup>.

172 To detect the pleiotropy effects of the significant loci, we counted the number of  
173 their identified times ([Supplementary Table S2](#)), and a few interesting findings were  
174 observed. Among all associations, the loci *MED24/PSMD3/CSF3/THRA* (CHR17:  
175 39,980,807-40,093,867) were identified the most. The associated phenotypes all belong  
176 to the leukocyte group, such as neutrophils, eosinophils, and basophils. The following  
177 genes are *ESR1*, *ABO*, and *JMJDIC*. Among them, *ESR1* was identified to be associated  
178 with fasting serum glucose, white blood cell counts, neutrophils counts and ratio,  
179 lymphocytes ratio, hemoglobin, and hematocrit; all *ESR1*-trait associations were novel  
180 findings. The gene *ABO* was associated with alkaline phosphatase, mean corpuscular  
181 hemoglobin concentration, mean corpuscular volume, thyroid-stimulating hormone,  
182 free triiodothyronine, and red blood cell distribution width-standard deviation; the  
183 former four associations were known, while the latter two were novel. For gene  
184 *JMJDIC*, the known associated phenotypes included  $\gamma$ -glutamyl transferase, platelet  
185 count, platelet size deviation width, and mean platelet volume; while newly identified  
186 associated traits were platelet larger cell ratio and aspartate aminotransferase. We used  
187 the phenome-wide association study (PheWAS) Manhattan plots to show the  
188 associations between one genetic variant and different phenotypes ([Figure 3](#)).

189 The number of identified loci and calculated heritability for each phenotype were  
190 provided in [Figure 2c](#). The heritability analysis showed that there were 51 phenotypes  
191 with heritability of 10% or more, with SE less than 5% in 36 of them. The results were  
192 quite consistent with that of GWAS and most of the phenotypes with high heritability  
193 belonged to hematological, followed by liver-related, kidney-related, infection, and the  
194 lowest was urinalysis. Among the phenotypes with SE less than 5%, platelet larger cell  
195 ratio (P-LCR) had the largest heritability of 32.0%. The heritability of maternal height  
196 and BMI were 30.0% and 26.8%, respectively, which were 26.0% and 0.2% less than  
197 previously reported results<sup>37,38</sup>. The main reason is that the coverage of ultra-low depth  
198 sequencing data is only 0.6%-1% of the entire genome, resulting in many undetected



199 variants. Even after high-quality genotype imputation, only about 2 million SNPs were  
200 included in the analysis after the quality control, thus the explained variation of the  
201 phenotype is lower than that of high-depth sequencing data.

202

203 **Pathway enrichment analysis.** The detailed results for all phenotypes were provided  
204 in [Supplementary Table S3](#). We also listed the most significant pathway for each  
205 phenotype in [Figure 4](#). At an empirical p-value less than 1e-04, 24 phenotypes had at  
206 least one significant pathway. Among them, the lymphocyte count had the maximum  
207 number of 14 associated pathways, followed by eosinophil percentage, eosinophil count,  
208 and  $\gamma$ -glutamyl transferase.

209 We found that the most important associated pathways belonging to the same  
210 category were often the same or similar. For example, pathways associated with the  
211 number and percentage of leukocytes included inflammatory molecular signaling  
212 pathways (e.g., BioCarta IL17 pathway), cytokine pathways involved in adaptive  
213 inflammatory host defense and cell growth (e.g., KEGG cytokine-cytokine receptor  
214 interaction), and epidermal growth factor receptor gene (*EGFR*) involved in pathways  
215 associated with a variety of human diseases (e.g., BioCarta EGFR SMRTE pathway).  
216 For glucose levels, such as serum glucose and oral glucose tolerance test measurements,  
217 the associated pathways were related to the development of pancreatic islet B cells  
218 (Reactome regulation of beta cell development), type II diabetes (KEGG maturity-onset  
219 diabetes of the young), and hormones (Reactome peptide hormone biosynthesis), all of  
220 which played important roles in glucose metabolism. Notable pathways associated with  
221 globulin, albumin ratio, and total protein are mainly immune-related pathways, such as  
222 BioCarta TALL1 pathway, KEGG intestinal immune network for IGA production, and  
223 KEGG primary immunodeficiency.

224 In addition, for a single phenotype, the most relevant pathway for bile acids is  
225 Reactome bile acid and bile salt metabolism, which mainly describes the synthesis and  
226 metabolism of bile acids and bile salts; the most significant pathway for platelet counts  
227 is Reactome hemostasis, which describes the physiological response of the body to  
228 hemostasis, including vasoconstriction, platelet thrombosis, and fibrin clot formation.

229 The enriched pathway for total and direct bilirubin levels are Reactome glucuronidation  
230 and KEGG pentose and glucuronate interconversions, which are involved in bilirubin  
231 metabolism. For fasting glucose levels in OGTT test, the enriched pathway is Reactome  
232 regulation of gene expression in beta cells, which is associated with beta cells and  
233 insulin synthesis.

234 Besides these previously known functional pathways, we also uncovered several  
235 candidate ones that might act in performing biological functions in phenotypes. The  
236 most significant pathway for birthweight is Reactome signaling by NODAL. The  
237 *NODAL* gene encodes a TGF-beta (transforming growth factor-beta) superfamily of  
238 proteins, which regulates early embryonic development and plays important roles in the  
239 maintenance of human embryonic stem cell pluripotency and placental development.  
240 The related pathways for maternal height included BioCarta GH pathway, Reactome  
241 growth hormone receptor signaling, and Reactome prolactin receptor signaling. The  
242 former two pathways were about growth hormones and played a major role in  
243 regulating growth during childhood and adolescence. A deficiency in growth hormone  
244 signaling can cause dwarfism. Interestingly, we found that prolactin receptor signaling  
245 also achieved molecular function in maternal height. Prolactin is a hormone secreted  
246 mainly by the anterior pituitary gland and regulates the development of the mammary  
247 gland and lactation. Whether this pathway plays a role specifically in female height  
248 requires further investigation. Among the few top functional pathways related to a twin  
249 pregnancy, we observed Reactome cell cycle checkpoints and Reactome mitotic G1-  
250 G1/S phases. The formation process of identical twins is mitotic, and we speculate that  
251 these two pathways play an important role in twin pregnancy.

252

253 **Partitioning heritability analysis.** The majority of the partitioning heritability results  
254 recapitulate our known biology knowledge ([Figure 5](#), [Supplementary Figure S5](#),  
255 [Supplementary Table S4](#)): leukocyte phenotypes (basophils, eosinophils, lymphocytes,  
256 monocytes) exhibit blood/immune cell-type enrichments; liver-related phenotypes  
257 (aspartate aminotransferase, total bilirubin, direct bilirubin, alkaline phosphatase,  
258 alanine aminotransferase) exhibit, liver, CNS, and blood/immune enrichments; virus

259 infection-related phenotypes (HBsAb, HBcAb, HBeAb, HBeAg, Anti-HCV) exhibit  
260 blood/immune cell-type enrichments. For a particular phenotype, maternal height  
261 exhibits musculoskeletal/connective enrichment; leukocyte esterase in urine exhibits  
262 blood/immune cell-type enrichment; urine clarity exhibits bladder enrichment; blood  
263 urea nitrogen exhibits urinary bladder cell-type enrichment; thyroid-stimulating  
264 hormone exhibits thyroid enrichment.

265 In addition to the aforementioned trait-tissue/cell-type relevance, we also noticed a  
266 few other interesting ones (Figure 5, Supplementary Table S4), which were closely  
267 related to pregnancy. The twin pregnancy exhibits embryoid bodies cell-type  
268 enrichment. The birth-type cesarean section exhibits fallopian tube cell-type enrichment.  
269 The birth weight and birth height exhibited ovary and embryonic stem cell enrichments.  
270 Previous research reported that birthweight was a relation to maternal ovarian size<sup>39,40</sup>.

271

272 **Replication in GWAS of pregnancy phenotypes.** As a replication strategy, we  
273 compared our GWAS results with three companion works to discover shared signals  
274 [cite]. For simplicity, we denote our work as PP (pregnancy phenotype), and the  
275 companion works are MM (maternal metabolite), NM (neonatal metabolite), and EHR  
276 (electronic health record). In total, we found 210 shared significant SNPs that were  
277 composed of 18 loci linking 19 representative pairs of possibly correlated traits  
278 (Supplementary Table S5). Some of the findings are well-established, such as  
279 PP:Vitamin\_D—MM:Vitamin\_D3 with *GC* gene (PP4 = 99.9%)<sup>41-43</sup>, PP:MCH—MM:  
280 Element\_Fe with *TMPRSS6* gene (PP4 = 100%)<sup>11,44,45</sup>, and PP:BMI—EHR:Obesity with  
281 *FTO* gene (PP4 = 96.7%)<sup>46-49</sup>, where MCH is mean corpuscular hemoglobin. Here, PP4  
282 indicates posterior probability of H4: one common causal variant of two GWAS studies.  
283 Some discoveries are novel but convincing, such as PP:Prealbumin—MM:Vitamin\_A  
284 with *GCKR* gene (PP4 = 99.5%), PP:CR—MM:Vitamin\_A with *GCKR* (PP4 = 98.6%),  
285 PP:MCH—NM:C2 with *MARCH8* gene (PP4 = 98.9%), PP:CR—MM:Element\_Mg  
286 with *CASP9* gene (PP4 = 95.6%), PP:UA—MM:Element\_Mg with *DNAJC16* gene  
287 (PP4 = 99.2%), and PP:FT4—MM:Element\_I with *SERPINA7/PWWP3B* (nearest) gene  
288 in X chromosome (PP4 = 94.3%), where CR is serum creatinine, C2 is acetylcarnitine,

289 UA is urine acid, and FT4 is free thyroxine. Specifically, prealbumin was initially  
290 discovered to function as a transport protein for thyroxine and vitamin A, and an  
291 intronic variant (rs780094) on *GCKR* was found as a significant positive association  
292 with vitamin A<sup>50</sup>, suggesting the likely association of prealbumin and *GCKR*. An early  
293 study reported that in the US population, vitamin A and CR were positively correlated  
294 with each other<sup>51</sup>, while CR was associated with *GCKR*<sup>11,52</sup>. Several studies have shown  
295 that higher magnesium levels were associated with lower risk of hyperuricaemia<sup>53,54</sup>,  
296 while urine acid had significant gene *DNAJC16*<sup>27,55</sup>. The plots for visualizing genetic  
297 colocalization analysis of two GWAS results from this study and the companion works  
298 were provided in [Figure 6](#) and [Supplementary Figure S6](#). The replication study  
299 validated our GWAS findings.

300

## 301 **Methods**

302 **Study subjects.** All the subjects were recruited from Wuhan Children's Hospital,  
303 Wuhan city, Hubei province, China during their pregnancy routine tests between 2015  
304 to 2020. Wuhan is the most populous city in Central China. This study was approved  
305 by the Institutional Review Boards at Wuhan Children's Hospital and BGI-Shenzhen  
306 and also approved by the Human Genetic Resources Administration of China.

307

308 **Genotype and imputation.** The genotype data were generated when pregnant women  
309 underwent NIPT screening from around the 12<sup>th</sup> week of pregnancy onwards. In detail,  
310 5ml peripheral venous blood was collected and stored at -80 Celsius degrees in EDTA-  
311 anticoagulated tubes. Plasma samples from pregnant women were sent to BGI-Wuhan  
312 for next-generation high-throughput sequencing, and genotype data with an ultra-low  
313 sequencing depth of 0.06X to 0.1X were obtained for each subject. FASTP software  
314 was used to remove read regions of low quality and potential adaptor sequences<sup>56</sup>. For  
315 genome alignment, single-end reads (35bp) were aligned to the human reference  
316 genome (GRCh38/hg38) using the BWA algorithm<sup>57</sup>. Then, we used the BaseVar  
317 algorithm to call SNPs and STITCH to impute the missing genotypes<sup>58</sup>. Finally, we  
318 filtered out samples if the sequencing depth was lower than 0.05X or the mapping rate  
319 was less than 90%.

320 To evaluate the genotype imputation performance, we used 30 randomly selected  
321 Han Chinese from the 1000 Genomes Project with 30X sequencing coverage  
322 (downloaded from [https://www.internationalgenome.org/data-portal/data-](https://www.internationalgenome.org/data-portal/data-collection/30x-grch38)  
323 [collection/30x-grch38](https://www.internationalgenome.org/data-portal/data-collection/30x-grch38)) as a true set, down-sampled to 0.1X sequencing depth, and  
324 imputed with the true NIPT genotype data by using STITCH. The imputation accuracy  
325 was computed as Pearson's correlation coefficient between the 30X true set and the  
326 imputed genotype. In addition to this assessment, we evaluated the imputation  
327 performance by comparing the imputed and true genotypes of three variants in two  
328 genes (*MTHFR* and *MTRR*), which were involved in the folic acid metabolism. In the  
329 obstetrical clinic, these three variants were often tested for folate metabolism ability in

330 pregnant women. Mutation carriers in these variants may have a higher risk of  
331 miscarriages or birth defects<sup>59</sup>.

332

333 **Phenotype.** A wide spectrum of traits was measured during the pregnancy routine tests,  
334 including basic maternal information, postnatal outcome, and laboratory measurements.  
335 The basic maternal information includes pregnant women's age, height, weight, and  
336 blood pressure. The postnatal outcome includes gestational week, delivery method,  
337 birth weight, and birth length. The laboratory measurements include various serum and  
338 urinary laboratory tests, such as hematology tests, liver function, urine sediment  
339 analysis, and viral infections. Since the body will undergo some adaptive or  
340 pathological changes as pregnancy progresses, pregnant women need to take some  
341 examinations more than once and see if the relevant indicators are normal. Multiple  
342 examinations during the entire pregnancy period produced multiple records. For  
343 quantitative traits, we took an average of multiple measurements, and for binary traits,  
344 we treated as positive once a positive result was observed. Detailed characteristics for  
345 each trait are shown in [Table 1](#).

346

347 **Genome-wide association analyses.** For each quantitative trait, we performed a  
348 GWAS analysis by fitting a linear regression model; and for a binary trait, we fitted a  
349 logistic model. This was achieved in PLINK 2.0 using the command line *-glm*<sup>60</sup>. The  
350 imputed genotype was measured in a dosage ranging from 0 to 2. The biallelic variants  
351 with minor allele frequency (MAF) > 0.05, Hardy-Weinberg equilibrium (HWE) p-  
352 value > 1e-6, and genotype missing rate < 0.1 were used in the GWAS analyses. The  
353 covariates adjusted in the model include women's age and the first five principal  
354 components (PCs). We set a genome-wide significance threshold of 5e-08 and a study-  
355 wide significance threshold of 4.81e-10 (=5e-8/104) by performing Bonferroni  
356 adjustment.

357 We defined an associated locus with a window size of 1MB based on its physical  
358 position in the genome and counted the number of loci associated with the phenotype.  
359 For a locus, if all SNPs it contains were less than 500 kb away from the reported trait-

360 associated SNPs in the GWAS catalog as of September 2022  
361 (<https://www.ebi.ac.uk/gwas/>), we defined this locus as known, and vice versa as novel.  
362 The genomic inflation factors ( $\lambda_{gc}$ ) were then calculated in R<sup>61</sup>. With the GWAS  
363 summary statistics of each trait, we used LD score regression (LDSC)<sup>62</sup> to estimate its  
364 heritability and confounding bias.

365

366 **Pathway enrichment analysis.** We used Pascal to calculate gene and pathway scores  
367 on summary data from GWAS<sup>63</sup>. In particular, Pascal used the reference population to  
368 calculate LD information, and the reference population used in this case was the Asian  
369 population (1000 genome phase 3 Asian population). Pascal used three external  
370 databases to define the gene set of each pathway, including BIOCARTA<sup>64</sup>, KEGG  
371 (Kyoto Encyclopedia of Genes and Genomes)<sup>65</sup>, and REACTOME<sup>66</sup>, with 1,077 gene  
372 sets. The window size set for this experiment was 50kb, and the significance of the path  
373 was evaluated using the empirical score. We used 1e-4 as the significance threshold.

374

375 **Partitioning heritability analysis.** We applied stratified LD score regression<sup>67</sup> to  
376 estimate the polygenic contributions of functional categories to heritability in each trait.  
377 We used 205 cell-type-specific annotations with gene expression data from the  
378 Genotype-Tissue Expression (GTEx) project<sup>68</sup> and Franke lab dataset<sup>69,70</sup>. The 205  
379 tissues and cell types were classified into nine categories, including adipose,  
380 blood/immune, cardiovascular, central nervous system (CNS), digestive, endocrine,  
381 liver, musculoskeletal/connective, and others. This classification is referenced to  
382 Finucane et al.<sup>71</sup>. The multi-tissue microarray gene expression file is  
383 “Multi\_tissue\_gene\_expr.EAS” containing both the GTEx dataset and the Franke lab  
384 dataset with East Asian populations. The baseline model LD score was  
385 1000G\_Phase3\_EAS.

386

387 **Replication study of GWAS candidate loci.** Ideally, the replication study of GWAS  
388 should be re-running the association inference conducted on independent samples from



389 the same population, while the sample size should be as large as or larger than the  
390 discovery sample. However, an independent dataset or GWAS summary statistics of the  
391 studied pregnancy phenotypes are largely not accessible in Chinese or East Asian women.  
392 As an alternative to this, we compared the identified SNP-trait associations in three  
393 companion works, which performed GWAS analysis for maternal metabolites [cite],  
394 neonatal metabolites [cite], and electronic health records for both pregnant women and  
395 newborns [cite], respectively. Specifically, we searched for shared genome-wide  
396 significant SNPs between our work and each of the external work. If any, we defined a  
397 genomic region of 1-Mb with 500-kb on each side of the lead SNP and performed  
398 colocalization analysis in *R:coloc* to test whether the two traits shared distinct or same  
399 causal variants<sup>72</sup>.  
400

## 401 **Discussion**

402 Pregnancy is a special period experienced by women, in which regular maternal  
403 examinations generate a large amount of systematic clinical data, however, there are  
404 few genetic studies targeting these pregnancy phenotypes. In recent years, with the  
405 popularity of noninvasive prenatal genetic testing technology, it has become possible to  
406 obtain high-throughput maternal genotype data. In this study, based on the genotype  
407 data of nearly 40,000 pregnant women with non-invasive prenatal genetic testing, we  
408 performed molecular biology analysis of hundreds of clinical maternal phenotypes and  
409 successfully replicated 75.18% of the trait-locus associations and also mined 101 novel  
410 loci involved with 37 phenotypes at the genome-wide significance threshold; the gene-  
411 set enrichment analysis not only further confirmed the phenotype-related pathways of  
412 action, but also discovered several pregnancy-specific associations; the results of  
413 heritability and partitioning heritability quantified the influence of genetic factors and  
414 highlighted valuable relevant tissue/cell types functioning in each phenotype.

415 Although our study provided an important reference and data resource for studying  
416 pregnancy phenotypes and complications, there are still several limitations. First, even  
417 though the genotype dataset was available in nearly 40,000 samples and the pregnancy  
418 traits were collected from over 30,000 women, the effective sample size in GWAS  
419 analysis was only around 20,000 after matching the genotype and phenotype datasets.  
420 The GWAS analysis requires larger sample sizes to achieve sufficient statistical power.  
421 Thus, we aim to collect more samples for performing larger-scale genetic studies in the  
422 future. Second, our phenotypes were all limited to clinical information and laboratory  
423 test indicators, and there is a lack of maternal disorders and adverse postnatal outcomes.  
424 Obtaining information on diseases diagnosed in the electronic medical record (EMR)  
425 system for pregnant women and analyzing them with pregnancy laboratory indicators  
426 such as genetic correlation<sup>73</sup> and causal inference are our further research directions.

427 As the growing of NIPT sequencing data, we expect more and larger genetic studies  
428 on maternal- and neonatal-related traits and diseases, the genome-wide association  
429 results would provide valuable reference and shed light on maternal and child health  
430 care. A systematic cataloging and summarization of these associations would be highly

431 effective for researchers to find what they need. Several websites have been developed  
432 as a collection of GWAS summary datasets studied on a wide variety of phenotypes and  
433 also available for researchers to browse and download, for example, the GWAS Catalog  
434 (<https://www.ebi.ac.uk/gwas/home>), the MRC Integrative Epidemiology Unit (IEU;  
435 <https://gwas.mrcieu.ac.uk/>), the PheWeb archive (<https://pheweb.sph.umich.edu/>), and  
436 the BioBank Japan PheWeb (<https://pheweb.jp/>). To offer a searchable, visualizable,  
437 and openly accessible database of pregnancy-related SNP-trait associations, we are  
438 currently building a free online website for sharing and visualizing the GWAS results  
439 reported by this work, study of maternal metabolites [cite], neonatal metabolites [cite],  
440 and EHR of maternal and neonatal [cite]. We anticipate that the website could play a  
441 fundamental role in studying genetic susceptibility of maternal/postnatal-related  
442 phenotypes and providing useful resources for scientists, clinicians, and other users  
443 worldwide.

## **Declaration of Interests**

The authors declare no competing interests.

## **Author contribution**

X.J., A.Z., and H.Z. conceived the study, designed the research program, and managed the project.

H.X., M.Y., J.Z., Y.Z., J.L., Y.Y.Z., Z.C., H.M., X.C., L.H., and R.Z. collected the data.

L.L., Y.T., Y.H., and P.L. preprocessed the data and finished the quality control.

H.Z., H.X., L.L., M.Y., J.Y.Z., M.C., and P.L. performed the statistical analysis and results visualization.

H.Z., H.X., L.L., M.Y., and M.C wrote the manuscript.

All authors participated in revising the manuscript.

## **Acknowledgment**

This study was supported by the Central Guidance on Local Science and Technology Development Fund of Hubei Province (2022BGE261), National Natural Science Foundation of China (32171441 and 32000398), Guangdong-Hong Kong Joint Laboratory on Immunological and Genetic Kidney Diseases (2019B121205005), Top Medical Young Talents (2019) of Hubei Province, Guangdong Provincial Key Laboratory of Genome Read and Write (2017B030301011), Open project of BGI-Shenzhen, Shenzhen 518000 China (BGIRSZ20200008), and the China National GeneBank.

## **Data availability**

The GWAS summary statistics of all studied phenotypes have been deposited into CNGB Sequence Archive (CNSA)<sup>74</sup> of China National GeneBank DataBase (CNGBdb)<sup>75</sup> with accession number CNP0003673.

## Reference

- 1 Kamatani, Y. *et al.* Genome-wide association study of hematological and biochemical traits in a Japanese population. *Nature genetics* **42**, 210-215, doi:10.1038/ng.531 (2010).
- 2 Astle, W. J. *et al.* The Allelic Landscape of Human Blood Cell Trait Variation and Links to Common Complex Disease. *Cell* **167**, 1415-1429.e1419, doi:10.1016/j.cell.2016.10.042 (2016).
- 3 Li, J. *et al.* Genome-wide association study on serum alkaline phosphatase levels in a Chinese population. *BMC genomics* **14**, 684, doi:10.1186/1471-2164-14-684 (2013).
- 4 Gao, C. *et al.* Genome-wide association analysis of serum alanine and aspartate aminotransferase, and the modifying effects of BMI in 388k European individuals. *Genetic epidemiology* **45**, 664-681, doi:10.1002/gepi.22392 (2021).
- 5 Kang, T. W. *et al.* Genome-wide association of serum bilirubin levels in Korean population. *Hum Mol Genet* **19**, 3672-3678, doi:10.1093/hmg/ddq281 (2010).
- 6 Okada, Y. *et al.* Meta-analysis identifies multiple loci associated with kidney function-related traits in east Asian populations. *Nature genetics* **44**, 904-909, doi:10.1038/ng.2352 (2012).
- 7 Pattaro, C. *et al.* Genetic associations at 53 loci highlight cell types and biological pathways relevant for kidney function. *Nature communications* **7**, 10023, doi:10.1038/ncomms10023 (2016).
- 8 Willer, C. J. *et al.* Discovery and refinement of loci associated with lipid levels. *Nature genetics* **45**, 1274-1283, doi:10.1038/ng.2797 (2013).
- 9 Surakka, I. *et al.* The impact of low-frequency and rare variants on lipid levels. *Nature genetics* **47**, 589-597, doi:10.1038/ng.3300 (2015).
- 10 Timmer, T. *et al.* Genetic determinants of ferritin, haemoglobin levels and haemoglobin trajectories: results from Donor InSight. *Vox Sang* **116**, 755-765, doi:10.1111/vox.13066 (2021).
- 11 Kanai, M. *et al.* Genetic analysis of quantitative traits in the Japanese population links cell types to complex human diseases. *Nature genetics* **50**, 390-400, doi:10.1038/s41588-018-0047-6 (2018).
- 12 Benonisdottir, S. *et al.* Sequence variants associating with urinary biomarkers. *Hum Mol Genet* **28**, 1199-1211, doi:10.1093/hmg/ddy409 (2019).
- 13 Ware, E. B. *et al.* Genome-wide Association Study of 24-Hour Urinary Excretion of Calcium, Magnesium, and Uric Acid. *Mayo Clin Proc Innov Qual Outcomes* **3**, 448-460, doi:10.1016/j.mayocpiqo.2019.08.007 (2019).
- 14 Sudlow, C. *et al.* UK biobank: an open access resource for identifying the causes of a wide range of complex diseases of middle and old age. *PLoS Med* **12**, e1001779, doi:10.1371/journal.pmed.1001779 (2015).
- 15 Kurki, M. I. *et al.* FinnGen: Unique genetic insights from combining isolated population and national health register data. *medRxiv*, 2022.2003.2003.22271360, doi:10.1101/2022.03.03.22271360 (2022).
- 16 Chen, L. *et al.* Maternal serum Lamin A is a potential biomarker that can predict adverse pregnancy outcomes. *EBioMedicine* **77**, 103932, doi:10.1016/j.ebiom.2022.103932 (2022).
- 17 Danielli, M. *et al.* Blood biomarkers to predict the onset of pre-eclampsia: A systematic review and meta-analysis. *Heliyon* **8**, e11226, doi:10.1016/j.heliyon.2022.e11226 (2022).
- 18 Kane, S. C., Costa Fda, S. & Brennecke, S. First trimester biomarkers in the prediction of later pregnancy complications. *Biomed Res Int* **2014**, 807196, doi:10.1155/2014/807196 (2014).

- 19 Rani, P. R. & Begum, J. Screening and Diagnosis of Gestational Diabetes Mellitus, Where Do We Stand. *Journal of clinical and diagnostic research : JCDR* **10**, Qe01-04, doi:10.7860/jcdr/2016/17588.7689 (2016).
- 20 Tongsong, T., Srisupundit, K. & Luewan, S. Outcomes of pregnancies affected by hemoglobin H disease. *Int J Gynaecol Obstet* **104**, 206-208, doi:10.1016/j.ijgo.2008.10.010 (2009).
- 21 Young, M. F. *et al.* Maternal hemoglobin concentrations across pregnancy and maternal and child health: a systematic review and meta-analysis. *Annals of the New York Academy of Sciences* **1450**, 47-68, doi:10.1111/nyas.14093 (2019).
- 22 Zhang, H. *et al.* Non-invasive prenatal testing for trisomies 21, 18 and 13: clinical experience from 146,958 pregnancies. *Ultrasound Obstet Gynecol* **45**, 530-538, doi:10.1002/uog.14792 (2015).
- 23 Liu, S. *et al.* Genomic Analyses from Non-invasive Prenatal Testing Reveal Genetic Associations, Patterns of Viral Infections, and Chinese Population History. *Cell* **175**, 347-359.e314, doi:10.1016/j.cell.2018.08.016 (2018).
- 24 Pruitt, K. D., Tatusova, T. & Maglott, D. R. NCBI Reference Sequence (RefSeq): a curated non-redundant sequence database of genomes, transcripts and proteins. *Nucleic acids research* **33**, D501-504, doi:10.1093/nar/gki025 (2005).
- 25 Taylor, P. N. *et al.* Whole-genome sequence-based analysis of thyroid function. *Nature communications* **6**, 5681, doi:10.1038/ncomms6681 (2015).
- 26 Sinnott-Armstrong, N. *et al.* Genetics of 35 blood and urine biomarkers in the UK Biobank. *Nature genetics* **53**, 185-194, doi:10.1038/s41588-020-00757-z (2021).
- 27 Sakaue, S. *et al.* A cross-population atlas of genetic associations for 220 human phenotypes. *Nature genetics* **53**, 1415-1424, doi:10.1038/s41588-021-00931-x (2021).
- 28 Vuckovic, D. *et al.* The Polygenic and Monogenic Basis of Blood Traits and Diseases. *Cell* **182**, 1214-1231.e1211, doi:10.1016/j.cell.2020.08.008 (2020).
- 29 Innes, H. *et al.* Genome-Wide Association Study for Alcohol-Related Cirrhosis Identifies Risk Loci in *MARCI* and *HNRNPUL1*. *Gastroenterology* **159**, 1276-1289.e1277, doi:10.1053/j.gastro.2020.06.014 (2020).
- 30 Liu, Y. *et al.* Genetic architecture of 11 organ traits derived from abdominal MRI using deep learning. *eLife* **10**, doi:10.7554/eLife.65554 (2021).
- 31 Yuan, X. *et al.* Population-based genome-wide association studies reveal six loci influencing plasma levels of liver enzymes. *Am J Hum Genet* **83**, 520-528, doi:10.1016/j.ajhg.2008.09.012 (2008).
- 32 Chen, M. H. *et al.* Trans-ethnic and Ancestry-Specific Blood-Cell Genetics in 746,667 Individuals from 5 Global Populations. *Cell* **182**, 1198-1213.e1114, doi:10.1016/j.cell.2020.06.045 (2020).
- 33 Barton, A. R., Sherman, M. A., Mukamel, R. E. & Loh, P. R. Whole-exome imputation within UK Biobank powers rare coding variant association and fine-mapping analyses. *Nature genetics* **53**, 1260-1269, doi:10.1038/s41588-021-00892-1 (2021).
- 34 Olden, M. *et al.* Common variants in *UMOD* associate with urinary uromodulin levels: a meta-analysis. *J Am Soc Nephrol* **25**, 1869-1882, doi:10.1681/asn.2013070781 (2014).
- 35 Pi, H. *et al.* A novel human SCAN/(Cys)2(His)2 zinc-finger transcription factor ZNF323 in early human embryonic development. *Biochem Biophys Res Commun* **296**, 206-213, doi:10.1016/s0006-291x(02)00772-6 (2002).

- 36 Tavian, D. *et al.* A new splicing site mutation of the ABCB4 gene in intrahepatic cholestasis of pregnancy with raised serum gamma-GT. *Dig Liver Dis* **41**, 671-675, doi:10.1016/j.dld.2008.12.101 (2009).
- 37 Yang, J. *et al.* Common SNPs explain a large proportion of the heritability for human height. *Nature genetics* **42**, 565-569, doi:10.1038/ng.608 (2010).
- 38 Yang, J. *et al.* Genetic variance estimation with imputed variants finds negligible missing heritability for human height and body mass index. *Nature genetics* **47**, 1114-1120, doi:10.1038/ng.3390 (2015).
- 39 Parisi, N., Tassi, A., Capodicasa, V., Xholli, A. & Cagnacci, A. Relation of Birthweight and Ovarian and Uterine Size Prior to Menarche. *Reproductive sciences (Thousand Oaks, Calif.)* **28**, 1347-1352, doi:10.1007/s43032-020-00351-y (2021).
- 40 Ibáñez, L., Potau, N., Enriquez, G. & de Zegher, F. Reduced uterine and ovarian size in adolescent girls born small for gestational age. *Pediatric research* **47**, 575-577, doi:10.1203/00006450-200005000-00003 (2000).
- 41 Jiang, X. *et al.* Genome-wide association study in 79,366 European-ancestry individuals informs the genetic architecture of 25-hydroxyvitamin D levels. *Nature communications* **9**, 260, doi:10.1038/s41467-017-02662-2 (2018).
- 42 Amin, H. A. & Drenos, F. No evidence that vitamin D is able to prevent or affect the severity of COVID-19 in individuals with European ancestry: a Mendelian randomisation study of open data. *BMJ Nutr Prev Health* **4**, 42-48, doi:10.1136/bmjnp-2020-000151 (2021).
- 43 Kim, Y. A. *et al.* Unveiling Genetic Variants Underlying Vitamin D Deficiency in Multiple Korean Cohorts by a Genome-Wide Association Study. *Endocrinol Metab (Seoul)* **36**, 1189-1200, doi:10.3803/EnM.2021.1241 (2021).
- 44 Yang, W. *et al.* Genome-wide association and Mendelian randomization study of blood copper levels and 213 deep phenotypes in humans. *Commun Biol* **5**, 405, doi:10.1038/s42003-022-03351-7 (2022).
- 45 Tanaka, T. *et al.* A genome-wide association analysis of serum iron concentrations. *Blood* **115**, 94-96, doi:10.1182/blood-2009-07-232496 (2010).
- 46 Akiyama, M. *et al.* Genome-wide association study identifies 112 new loci for body mass index in the Japanese population. *Nature genetics* **49**, 1458-1467, doi:10.1038/ng.3951 (2017).
- 47 Dorajoo, R. *et al.* Replication of 13 obesity loci among Singaporean Chinese, Malay and Asian-Indian populations. *Int J Obes (Lond)* **36**, 159-163, doi:10.1038/ijo.2011.86 (2012).
- 48 Wang, K. *et al.* A genome-wide association study on obesity and obesity-related traits. *PloS one* **6**, e18939, doi:10.1371/journal.pone.0018939 (2011).
- 49 Monda, K. L. *et al.* A meta-analysis identifies new loci associated with body mass index in individuals of African ancestry. *Nature genetics* **45**, 690-696, doi:10.1038/ng.2608 (2013).
- 50 Fernandes Silva, L., Vangipurapu, J., Kuulasmaa, T. & Laakso, M. An intronic variant in the GCKR gene is associated with multiple lipids. *Sci Rep* **9**, 10240, doi:10.1038/s41598-019-46750-3 (2019).
- 51 Chen, J., He, J., Ogden, L. G., Batuman, V. & Whelton, P. K. Relationship of serum antioxidant vitamins to serum creatinine in the US population. *Am J Kidney Dis* **39**, 460-468, doi:10.1053/ajkd.2002.31389 (2002).
- 52 Lotta, L. A. *et al.* A cross-platform approach identifies genetic regulators of human metabolism and health. *Nature genetics* **53**, 54-64, doi:10.1038/s41588-020-00751-5 (2021).



- 53 Zhang, Y. & Qiu, H. Dietary Magnesium Intake and Hyperuricemia among US Adults. *Nutrients* **10**, doi:10.3390/nu10030296 (2018).
- 54 Cao, J. *et al.* Plasma magnesium and the risk of new-onset hyperuricaemia in hypertensive patients. *Br J Nutr*, 1-8, doi:10.1017/s0007114520001099 (2020).
- 55 Lee, C. J. *et al.* Phenome-wide analysis of Taiwan Biobank reveals novel glycemia-related loci and genetic risks for diabetes. *Commun Biol* **5**, 1175, doi:10.1038/s42003-022-04168-0 (2022).
- 56 Chen, S., Zhou, Y., Chen, Y. & Gu, J. fastp: an ultra-fast all-in-one FASTQ preprocessor. *Bioinformatics (Oxford, England)* **34**, i884-i890, doi:10.1093/bioinformatics/bty560 (2018).
- 57 Li, H. & Durbin, R. Fast and accurate short read alignment with Burrows-Wheeler transform. *Bioinformatics (Oxford, England)* **25**, 1754-1760, doi:10.1093/bioinformatics/btp324 (2009).
- 58 Davies, R. W. *et al.* Rapid genotype imputation from sequence with reference panels. *Nature genetics* **53**, 1104-1111, doi:10.1038/s41588-021-00877-0 (2021).
- 59 Long, S. & Goldblatt, J. MTHFR genetic testing: Controversy and clinical implications. *Aust Fam Physician* **45**, 237-240 (2016).
- 60 Chang, C. C. *et al.* Second-generation PLINK: rising to the challenge of larger and richer datasets. *Gigascience* **4**, 7, doi:10.1186/s13742-015-0047-8 (2015).
- 61 Team, R. C. R: A language and environment for statistical computing. *MSOR connections* **1** (2014).
- 62 Bulik-Sullivan, B. K. *et al.* LD Score regression distinguishes confounding from polygenicity in genome-wide association studies. *Nature genetics* **47**, 291-295, doi:10.1038/ng.3211 (2015).
- 63 Lamparter, D., Marbach, D., Rueedi, R., Kutalik, Z. & Bergmann, S. Fast and Rigorous Computation of Gene and Pathway Scores from SNP-Based Summary Statistics. *PLoS computational biology* **12**, e1004714, doi:10.1371/journal.pcbi.1004714 (2016).
- 64 Nishimura, D. BioCarta. *Biotech Software & Internet Report* **2**, 117-120, doi:10.1089/152791601750294344 (2001).
- 65 Kanehisa, M., Furumichi, M., Tanabe, M., Sato, Y. & Morishima, K. KEGG: new perspectives on genomes, pathways, diseases and drugs. *Nucleic acids research* **45**, D353-d361, doi:10.1093/nar/gkw1092 (2017).
- 66 Croft, D. *et al.* Reactome: a database of reactions, pathways and biological processes. *Nucleic acids research* **39**, D691-697, doi:10.1093/nar/gkq1018 (2011).
- 67 Finucane, H. K. *et al.* Partitioning heritability by functional annotation using genome-wide association summary statistics. *Nature genetics* **47**, 1228-1235, doi:10.1038/ng.3404 (2015).
- 68 Human genomics. The Genotype-Tissue Expression (GTEx) pilot analysis: multitissue gene regulation in humans. *Science (New York, N.Y.)* **348**, 648-660, doi:10.1126/science.1262110 (2015).
- 69 Pers, T. H. *et al.* Biological interpretation of genome-wide association studies using predicted gene functions. *Nature communications* **6**, 5890, doi:10.1038/ncomms6890 (2015).
- 70 Fehrmann, R. S. *et al.* Gene expression analysis identifies global gene dosage sensitivity in cancer. *Nature genetics* **47**, 115-125, doi:10.1038/ng.3173 (2015).
- 71 Finucane, H. K. *et al.* Heritability enrichment of specifically expressed genes identifies disease-relevant tissues and cell types. *Nature genetics* **50**, 621-629, doi:10.1038/s41588-018-0081-4 (2018).
- 72 Giambartolomei, C. *et al.* Bayesian test for colocalisation between pairs of genetic association studies using summary statistics. *PLoS Genet* **10**, e1004383, doi:10.1371/journal.pgen.1004383

(2014).

- 73 Bulik-Sullivan, B. *et al.* An atlas of genetic correlations across human diseases and traits. *Nature genetics* **47**, 1236-1241, doi:10.1038/ng.3406 (2015).
- 74 Guo, X. *et al.* CNSA: a data repository for archiving omics data. *Database : the journal of biological databases and curation* **2020**, doi:10.1093/database/baaa055 (2020).
- 75 Chen, F. Z. *et al.* CNGBdb: China National GeneBank DataBase. *Yi chuan = Hereditas* **42**, 799-809, doi:10.16288/j.ycz.20-080 (2020).

**Figure 1.** The information on imputed genetic variants

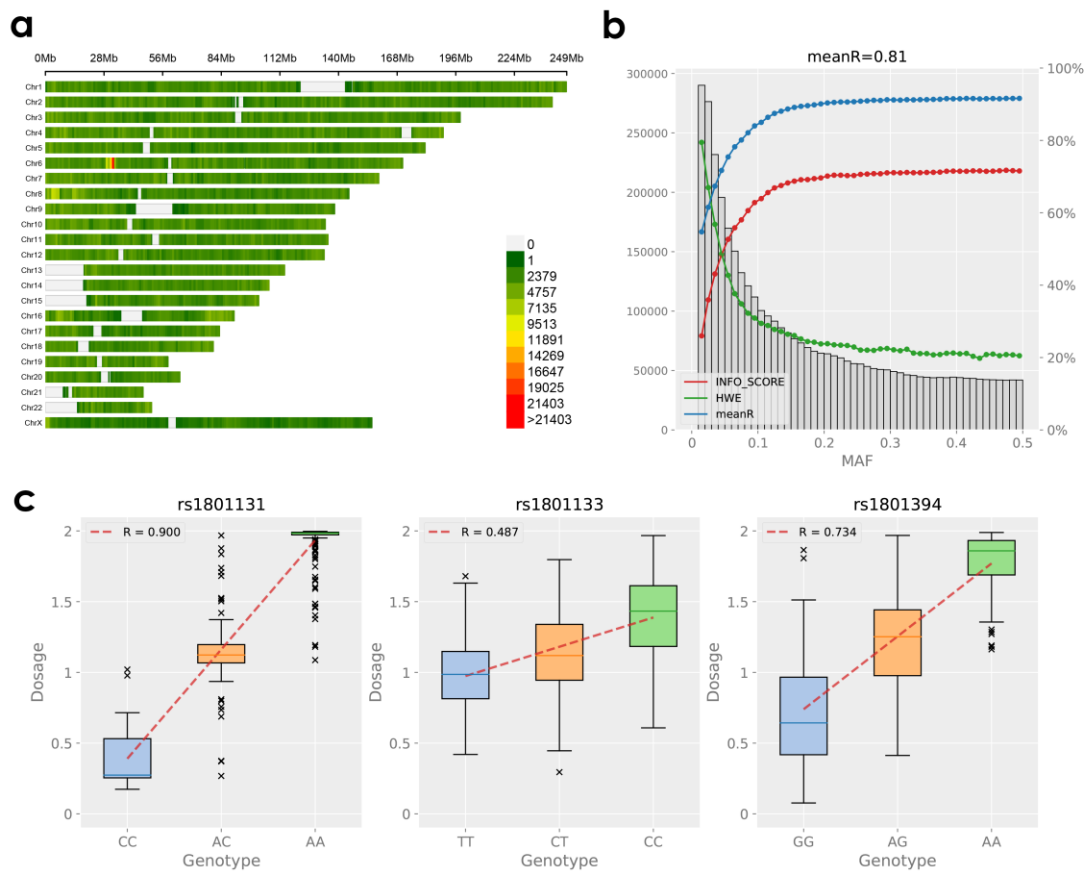

*Notes:* **a)** the SNP density plot of imputed variants, **b)** the genotype imputation accuracy calculated by Pearson's correlation between high-coverage sequencing data and imputed dosage, and **c)** the boxplot visualization and Pearson's correlation between imputed and true genotypes of two variants on gene *MTHFR* (rs1801131 and rs1801133) and one variant on gene *MTRR* (rs1801394).

**Figure 2.** Overview of the identified trait-locus associations

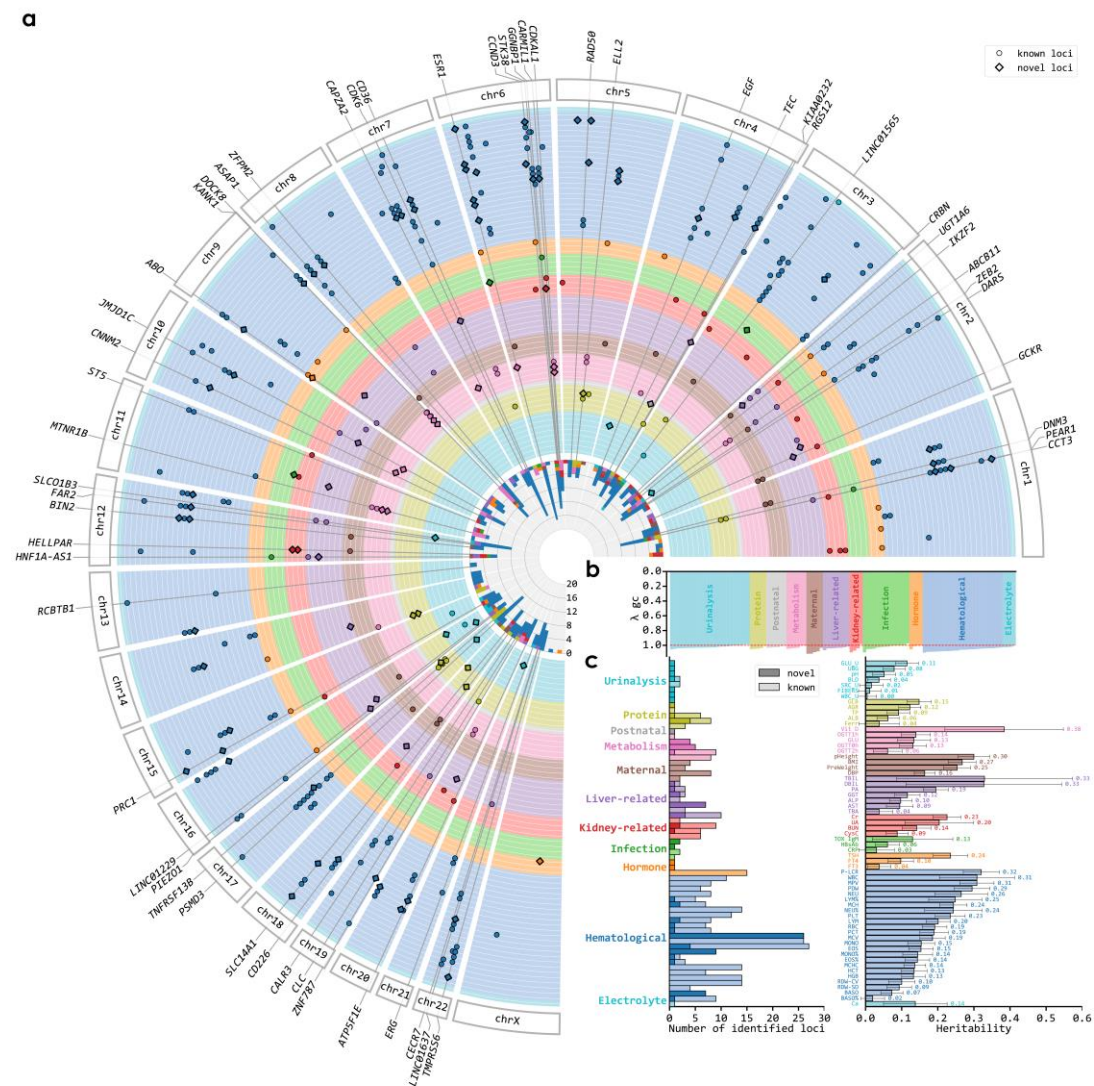

*Notes:* **a)** the circos plot presents the identified trait-locus associations, from inner to outer circle, different colors represent different phenotype categories, **b)** the genomic inflation factors ( $\lambda_{gc}$ ) for each phenotype, and **c)** the bar plot (left) provides the number of identified trait-associated loci for each trait, grouped by phenotype categories; and the bar plot (right) provides the heritability value for each phenotype.

**Figure 3.** PheWAS Manhattan plots

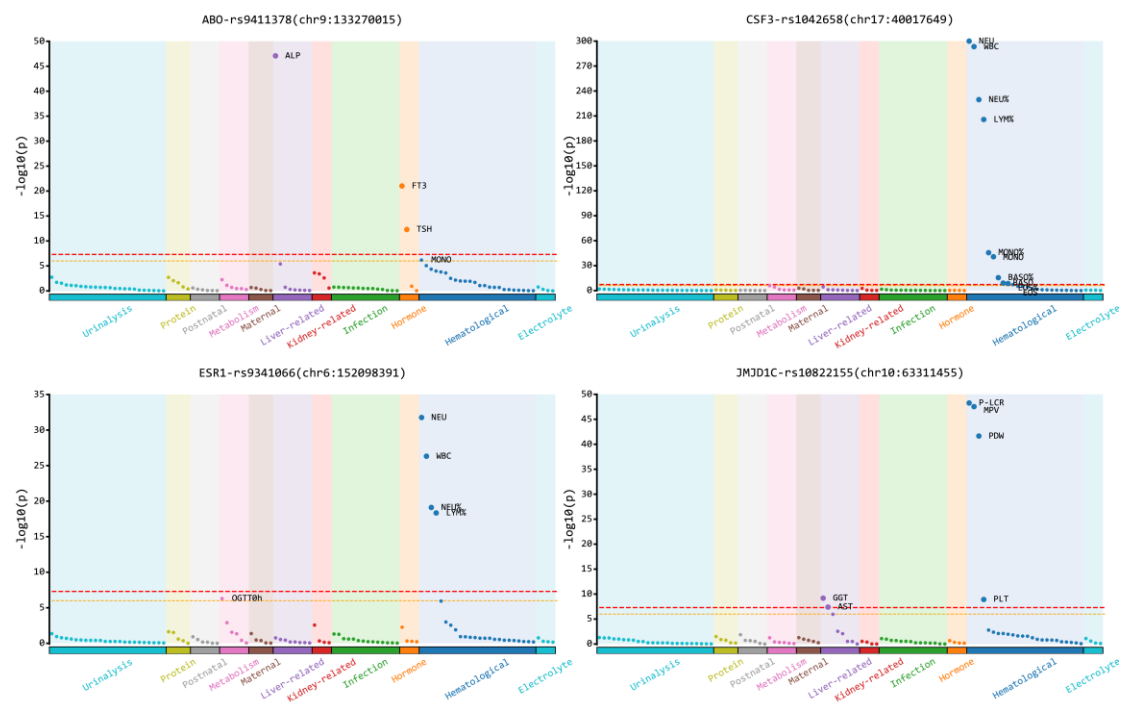

*Notes:* the GWAS associations for four listed SNPs and phenotypes in different categories. The yellow dashed line indicates  $-\log_{10}(1e-06)$  and the red dashed line indicates  $-\log_{10}(5e-08)$ .

**Figure 4.** The gene-set enrichment analysis based on SNP-based GWAS results

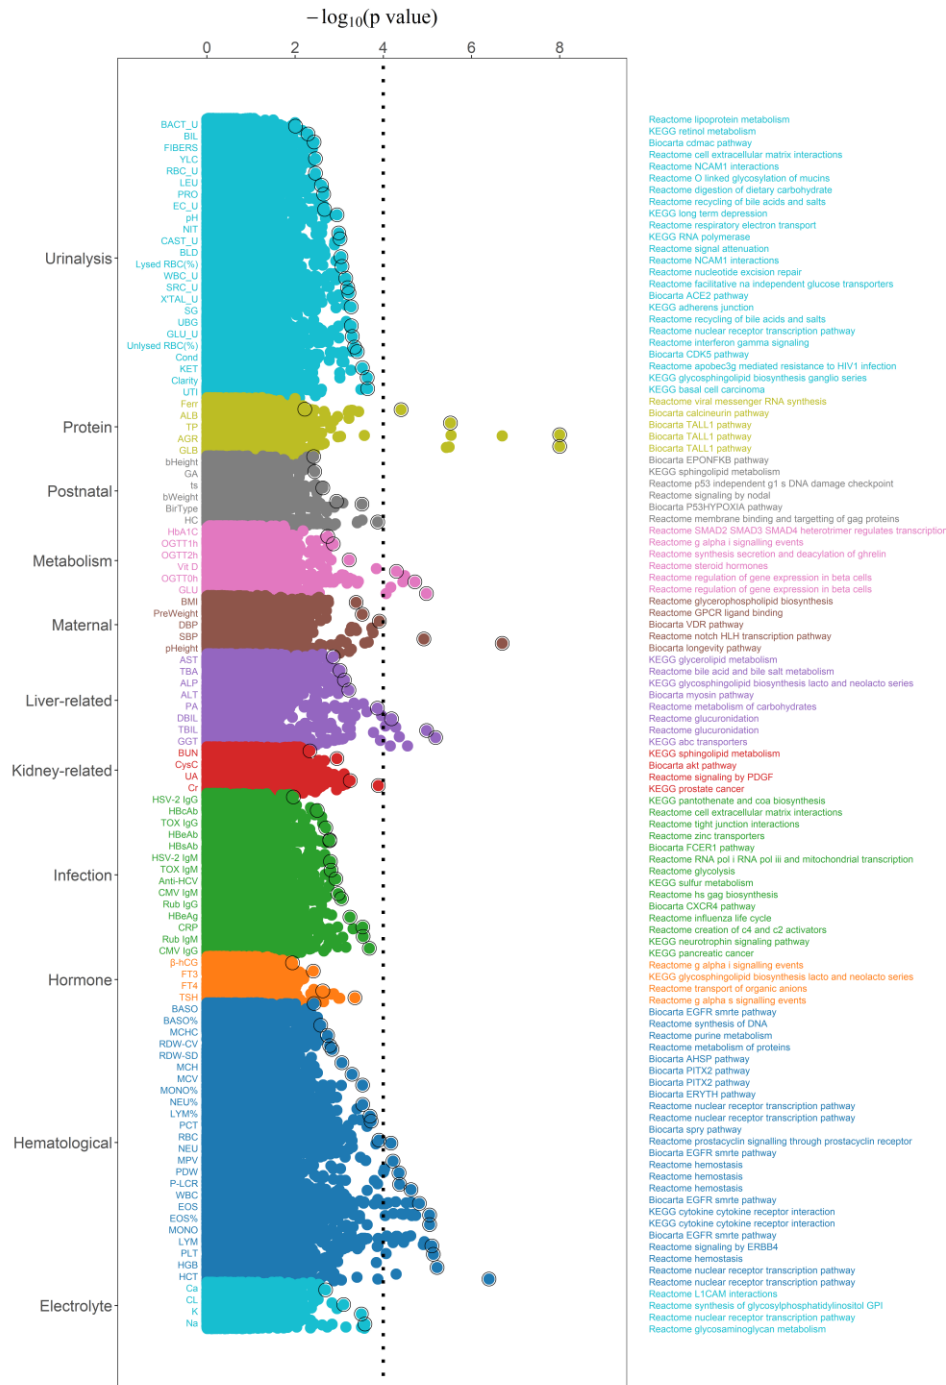

*Notes:* The x-axis represents the  $-\log_{10}$  transformed empirical p-values for pathways.

The most significantly associated pathway with each trait was labeled.

**Figure 5.** Results of the partitioning heritability analysis for selected traits

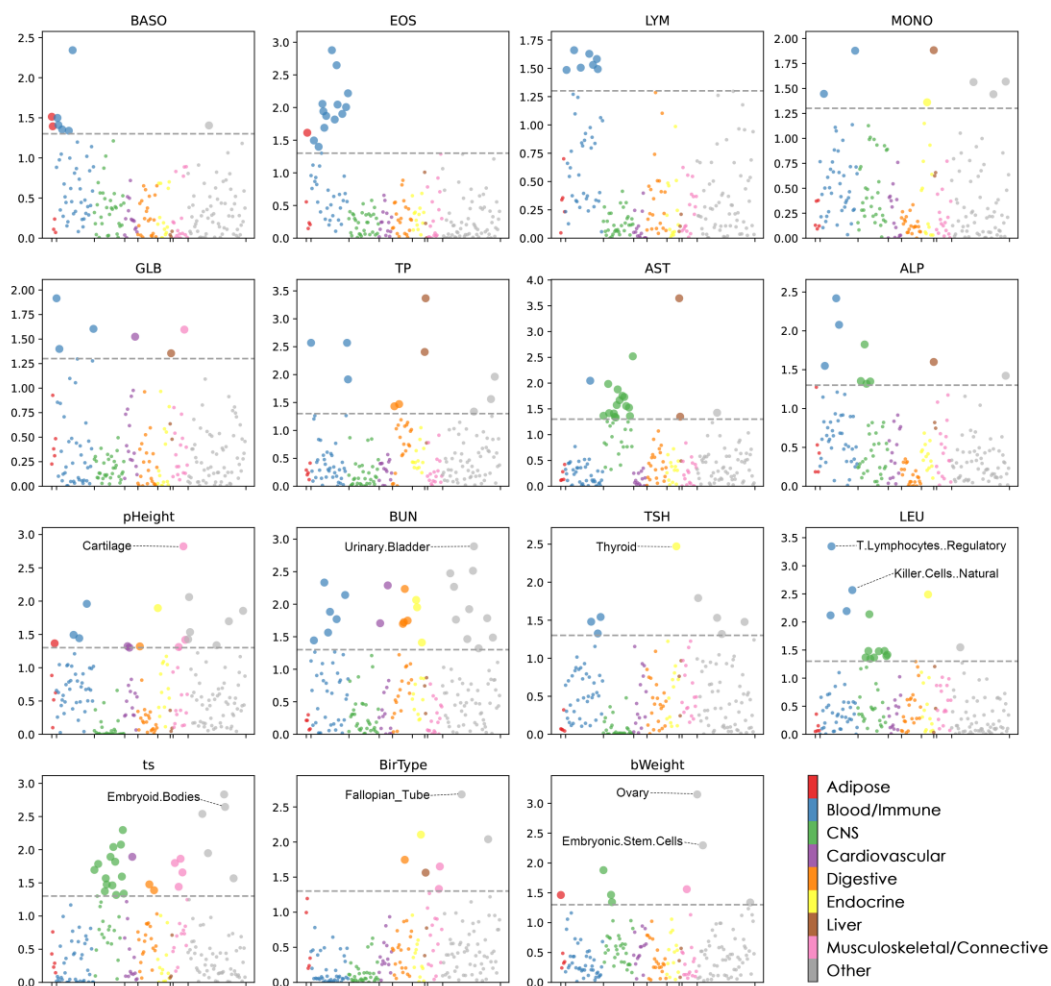

*Notes:* Each point represents a tissue/cell type from either the GTEx data set or the Franke lab data set. Large points pass the p-value < 5% cutoff,  $-\log_{10}(P) > 1.30$ .



**Figure 6.** The genetic colocalization analysis of our study and the companion works

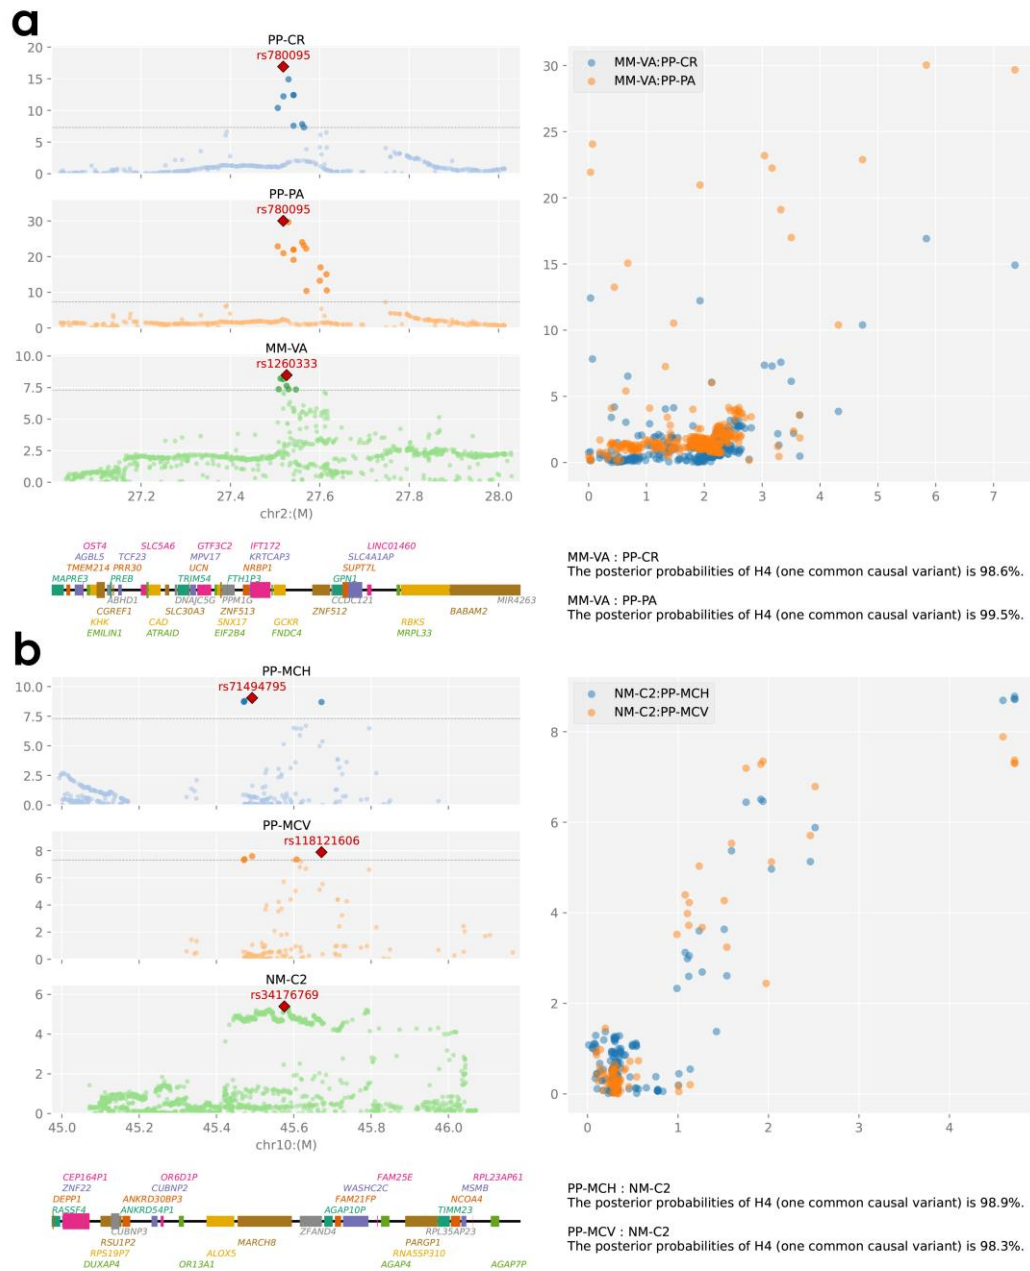

*Notes: a-b)* plots for visualizing colocalization analysis for pairs of phenotypes from this study and the companion works, where PP is pregnancy phenotypes, MM is maternal metabolites, NM is neonatal metabolites, CR is serum creatinine, prealbumin, VA is vitamin A, MCH is mean corpuscular hemoglobin, MCV is mean corpuscular volume, and C2 is acetylcarnitine.

**Table 1.** Overview of the studied pregnancy phenotypes

| Category                                             | Trait                                             | Abbreviation        | N      | Number of loci | Number of Novel loci                                    | Genome-wide novel gene                                                                                                                                                                                                                                                                                 | Study-wide novel gene                                                                                                                                                                                           |      |
|------------------------------------------------------|---------------------------------------------------|---------------------|--------|----------------|---------------------------------------------------------|--------------------------------------------------------------------------------------------------------------------------------------------------------------------------------------------------------------------------------------------------------------------------------------------------------|-----------------------------------------------------------------------------------------------------------------------------------------------------------------------------------------------------------------|------|
| Maternal                                             | Body mass index                                   | BMI                 | 17,605 | 4              | 0                                                       | None                                                                                                                                                                                                                                                                                                   | None                                                                                                                                                                                                            |      |
|                                                      | Pre-pregnancy weight                              | PreWeight           | 17,609 | 3              | 0                                                       | None                                                                                                                                                                                                                                                                                                   | None                                                                                                                                                                                                            |      |
|                                                      | Maternal height                                   | pHeight             | 17,620 | 8              | 0                                                       | None                                                                                                                                                                                                                                                                                                   | None                                                                                                                                                                                                            |      |
|                                                      | Diastolic blood pressure                          | DBP                 | 17,642 | 2              | 0                                                       | None                                                                                                                                                                                                                                                                                                   | None                                                                                                                                                                                                            |      |
|                                                      | Systolic blood pressure                           | SBP                 | 17,642 | 0              | 0                                                       | None                                                                                                                                                                                                                                                                                                   | None                                                                                                                                                                                                            |      |
| Postnatal                                            | Head circumference at birth                       | HC                  | 2,990  | 0              | 0                                                       | None                                                                                                                                                                                                                                                                                                   | None                                                                                                                                                                                                            |      |
|                                                      | Length at birth                                   | bHeight             | 20,663 | 0              | 0                                                       | None                                                                                                                                                                                                                                                                                                   | None                                                                                                                                                                                                            |      |
|                                                      | Weight at birth                                   | bWeight             | 20,668 | 0              | 0                                                       | None                                                                                                                                                                                                                                                                                                   | None                                                                                                                                                                                                            |      |
|                                                      | Delivery type                                     | BirType             | 20,849 | 0              | 0                                                       | None                                                                                                                                                                                                                                                                                                   | None                                                                                                                                                                                                            |      |
|                                                      | Gestational age                                   | GA                  | 20,885 | 0              | 0                                                       | None                                                                                                                                                                                                                                                                                                   | None                                                                                                                                                                                                            |      |
|                                                      | Twin pregnancy                                    | ts                  | 20,887 | 1              | 1                                                       | chr4:18823201                                                                                                                                                                                                                                                                                          | None                                                                                                                                                                                                            |      |
|                                                      | Electrolyte                                       | Calcium             | Ca     | 5,457          | 1                                                       | 0                                                                                                                                                                                                                                                                                                      | None                                                                                                                                                                                                            | None |
| Chloride                                             |                                                   | CL                  | 5,460  | 0              | 0                                                       | None                                                                                                                                                                                                                                                                                                   | None                                                                                                                                                                                                            |      |
| Potassium                                            |                                                   | K                   | 5,460  | 0              | 0                                                       | None                                                                                                                                                                                                                                                                                                   | None                                                                                                                                                                                                            |      |
| Sodium                                               |                                                   | Na                  | 5,460  | 0              | 0                                                       | None                                                                                                                                                                                                                                                                                                   | None                                                                                                                                                                                                            |      |
| Hematological                                        |                                                   | Basophil count      | BASO   | 18,761         | 11                                                      | 0                                                                                                                                                                                                                                                                                                      | None                                                                                                                                                                                                            | None |
|                                                      | Basophil percentage                               | BASO%               | 18,761 | 8              | 0                                                       | None                                                                                                                                                                                                                                                                                                   | None                                                                                                                                                                                                            |      |
|                                                      | Eosinophil count                                  | EOS                 | 18,761 | 6              | 0                                                       | None                                                                                                                                                                                                                                                                                                   | None                                                                                                                                                                                                            |      |
|                                                      | Eosinophil percentage                             | EOS%                | 18,761 | 8              | 0                                                       | None                                                                                                                                                                                                                                                                                                   | None                                                                                                                                                                                                            |      |
|                                                      | Lymphocyte count                                  | LYM                 | 18,761 | 5              | 1                                                       | chr17:35229013                                                                                                                                                                                                                                                                                         | None                                                                                                                                                                                                            |      |
|                                                      | Lymphocyte percentage                             | LYM%                | 18,761 | 7              | 2                                                       | R3HDM1, ESR1                                                                                                                                                                                                                                                                                           | ESR1                                                                                                                                                                                                            |      |
|                                                      | Monocyte count                                    | MONO                | 18,761 | 14             | 0                                                       | None                                                                                                                                                                                                                                                                                                   | None                                                                                                                                                                                                            |      |
|                                                      | Monocyte percentage                               | MONO%               | 18,761 | 12             | 0                                                       | None                                                                                                                                                                                                                                                                                                   | None                                                                                                                                                                                                            |      |
|                                                      | Neutrophil count                                  | NEU                 | 18,761 | 8              | 2                                                       | EGF, ESR1                                                                                                                                                                                                                                                                                              | EGF, ESR1                                                                                                                                                                                                       |      |
|                                                      | Neutrophil percentage                             | NEU%                | 18,761 | 7              | 1                                                       | ESR1                                                                                                                                                                                                                                                                                                   | ESR1                                                                                                                                                                                                            |      |
|                                                      | Plateletcrit                                      | PCT                 | 18,786 | 8              | 1                                                       | ZNF787                                                                                                                                                                                                                                                                                                 | ZNF787                                                                                                                                                                                                          |      |
|                                                      | platelet larger cell ratio                        | P-LCR               | 18,841 | 26             | 26                                                      | PEAR1, DNMT3, chr1:198823512, chr3:56815027, KIAA0232, TEC, RPL7P22, CARMIL1, STK38, CD36, chr7:106712411, CAPPZA2, ZFPM2, ASAP1, DOCK8, JMJD1C, chr12:6184308, FAR2, BIN2, LAMP1, DLGAP5, PLEKH02, CD226, JMJD1C, chr12:6184308, FAR2, BIN2, LAMP1, DLGAP5, PLEKH02, CD226, SIRPD, ATP5F1E, LINC01637 | PEAR1, DNMT3, chr1:198823512, KIAA0232, RPL7P22, CARMIL1, STK38, CD36, chr7:106712411, ZFPM2, ASAP1, DOCK8, JMJD1C, chr12:6184308, FAR2, BIN2, LAMP1, DLGAP5, PLEKH02, CD226, chr20:1945078, ATP5F1E, LINC01637 |      |
|                                                      | Mean platelet volume                              | MPV                 | 18,900 | 26             | 0                                                       | LINC01637                                                                                                                                                                                                                                                                                              | None                                                                                                                                                                                                            |      |
|                                                      | Platelet size deviation width                     | PDW                 | 18,900 | 27             | 4                                                       | RPL7P22, CD36, BIN2, chr20:54074364                                                                                                                                                                                                                                                                    | CD36, BIN2                                                                                                                                                                                                      |      |
|                                                      | Red cell distribution width-standard deviation    | RDW-SD              | 18,934 | 9              | 9                                                       | CCT3, LINC01184, ADGRF5, chr6:135097497, ABO, CNNM2, PRC1, AXIN1, SLC14A1                                                                                                                                                                                                                              | CCT3, LINC01184, chr6:135097497, ABO, PRC1, AXIN1, SLC14A1                                                                                                                                                      |      |
|                                                      | Hematocrit                                        | HCT                 | 18,990 | 2              | 1                                                       | ESR1                                                                                                                                                                                                                                                                                                   | None                                                                                                                                                                                                            |      |
|                                                      | Hemoglobin                                        | HGB                 | 18,990 | 3              | 1                                                       | ESR1                                                                                                                                                                                                                                                                                                   | None                                                                                                                                                                                                            |      |
|                                                      | Mean corpuscular hemoglobin                       | MCH                 | 18,990 | 14             | 0                                                       | None                                                                                                                                                                                                                                                                                                   | None                                                                                                                                                                                                            |      |
|                                                      | Mean corpuscular hemoglobin concentration         | MCHC                | 18,990 | 7              | 0                                                       | None                                                                                                                                                                                                                                                                                                   | None                                                                                                                                                                                                            |      |
|                                                      | Mean corpuscular volume                           | MCV                 | 18,990 | 14             | 0                                                       | None                                                                                                                                                                                                                                                                                                   | None                                                                                                                                                                                                            |      |
| Platelet count                                       | PLT                                               | 18,990              | 14     | 0              | None                                                    | None                                                                                                                                                                                                                                                                                                   |                                                                                                                                                                                                                 |      |
| Red blood cell count                                 | RBC                                               | 18,990              | 4      | 0              | None                                                    | None                                                                                                                                                                                                                                                                                                   |                                                                                                                                                                                                                 |      |
| Red cell distribution width-coefficient of variation | RDW-CV                                            | 18,990              | 7      | 7              | CCT3, LINC01184, CSNK1A1, USP49, PRC1, C18orf25, TMRSS6 | CCT3, LINC01184, USP49, PRC1, TMRSS6                                                                                                                                                                                                                                                                   |                                                                                                                                                                                                                 |      |
| White blood cell count                               | WBC                                               | 18,990              | 9      | 1              | ESR1                                                    | ESR1                                                                                                                                                                                                                                                                                                   |                                                                                                                                                                                                                 |      |
| Hormone                                              | β-human chorionic gonadotropin                    | β-hCG               | 5,839  | 0              | 0                                                       | None                                                                                                                                                                                                                                                                                                   | None                                                                                                                                                                                                            |      |
|                                                      | Free thyroxine                                    | FT4                 | 15,241 | 1              | 1                                                       | chrX:106056358                                                                                                                                                                                                                                                                                         | None                                                                                                                                                                                                            |      |
|                                                      | Free triiodothyronine                             | FT3                 | 15,241 | 1              | 1                                                       | ABO                                                                                                                                                                                                                                                                                                    | ABO                                                                                                                                                                                                             |      |
|                                                      | Thyroid-stimulating hormone                       | TSH                 | 15,350 | 15             | 0                                                       | None                                                                                                                                                                                                                                                                                                   | None                                                                                                                                                                                                            |      |
| Infection                                            | Herpes simplex virus type 2 specific IgG antibody | HSV-2 IgG           | 3,695  | 0              | 0                                                       | None                                                                                                                                                                                                                                                                                                   | None                                                                                                                                                                                                            |      |
|                                                      | Herpes simplex virus type 2 specific IgM antibody | HSV-2 IgM           | 3,695  | 0              | 0                                                       | None                                                                                                                                                                                                                                                                                                   | None                                                                                                                                                                                                            |      |
|                                                      | Cytomegalovirus IgG antibody                      | CMV IgG             | 4,020  | 0              | 0                                                       | None                                                                                                                                                                                                                                                                                                   | None                                                                                                                                                                                                            |      |
|                                                      | Cytomegalovirus IgM antibody                      | CMV IgM             | 4,020  | 2              | 2                                                       | chr6:164602849, SLC22A6                                                                                                                                                                                                                                                                                | None                                                                                                                                                                                                            |      |
|                                                      | Toxoplasma gondii IgG antibody                    | TOX IgG             | 4,125  | 0              | 0                                                       | None                                                                                                                                                                                                                                                                                                   | None                                                                                                                                                                                                            |      |
|                                                      | Toxoplasma gondii IgM antibody                    | TOX IgM             | 4,125  | 1              | 1                                                       | chr3:110125664                                                                                                                                                                                                                                                                                         | None                                                                                                                                                                                                            |      |
|                                                      | Rubella IgG antibody                              | Rub IgG             | 4,324  | 0              | 0                                                       | None                                                                                                                                                                                                                                                                                                   | None                                                                                                                                                                                                            |      |
|                                                      | Rubella IgM antibody                              | Rub IgM             | 5,716  | 0              | 0                                                       | None                                                                                                                                                                                                                                                                                                   | None                                                                                                                                                                                                            |      |
|                                                      | C-reactive protein                                | CRP                 | 9,795  | 2              | 0                                                       | None                                                                                                                                                                                                                                                                                                   | None                                                                                                                                                                                                            |      |
|                                                      | Hepatitis B core antibody                         | HBeAb               | 15,259 | 0              | 0                                                       | None                                                                                                                                                                                                                                                                                                   | None                                                                                                                                                                                                            |      |
|                                                      | Hepatitis B envelope antibody                     | HBeAb               | 15,259 | 0              | 0                                                       | None                                                                                                                                                                                                                                                                                                   | None                                                                                                                                                                                                            |      |
|                                                      | Hepatitis B envelope antigen                      | HBeAg               | 15,259 | 0              | 0                                                       | None                                                                                                                                                                                                                                                                                                   | None                                                                                                                                                                                                            |      |
|                                                      | Hepatitis B surface antibody                      | HBSAb               | 15,259 | 1              | 0                                                       | None                                                                                                                                                                                                                                                                                                   | None                                                                                                                                                                                                            |      |
|                                                      | Hepatitis C virus antibody                        | Anti-HCV            | 15,596 | 0              | 0                                                       | None                                                                                                                                                                                                                                                                                                   | None                                                                                                                                                                                                            |      |
|                                                      | Kidney-related                                    | Cystatin C          | CysC   | 17,489         | 2                                                       | 0                                                                                                                                                                                                                                                                                                      | None                                                                                                                                                                                                            | None |
|                                                      |                                                   | Blood urea nitrogen | BUN    | 17,603         | 9                                                       | 2                                                                                                                                                                                                                                                                                                      | ZSCAN31, IGF1                                                                                                                                                                                                   | None |
| Serum creatinine                                     |                                                   | Cr                  | 17,603 | 6              | 1                                                       | HELLPAR                                                                                                                                                                                                                                                                                                | HELLPAR                                                                                                                                                                                                         |      |
| Uric acid                                            |                                                   | UA                  | 17,603 | 6              | 0                                                       | None                                                                                                                                                                                                                                                                                                   | None                                                                                                                                                                                                            |      |
| Liver-related                                        | Total bile acid                                   | TBA                 | 13,357 | 2              | 1                                                       | SLC39A9                                                                                                                                                                                                                                                                                                | SLC39A9                                                                                                                                                                                                         |      |
|                                                      | Alanine aminotransferase                          | ALT                 | 17,721 | 0              | 0                                                       | None                                                                                                                                                                                                                                                                                                   | None                                                                                                                                                                                                            |      |
|                                                      | Alkaline phosphatase                              | ALP                 | 17,721 | 3              | 1                                                       | chr2:232390130                                                                                                                                                                                                                                                                                         | None                                                                                                                                                                                                            |      |
|                                                      | Aspartate aminotransferase                        | AST                 | 17,721 | 3              | 2                                                       | JMJD1C, CDH3                                                                                                                                                                                                                                                                                           | JMJD1C                                                                                                                                                                                                          |      |
|                                                      | Direct bilirubin                                  | DBIL                | 17,721 | 2              | 0                                                       | None                                                                                                                                                                                                                                                                                                   | None                                                                                                                                                                                                            |      |

|            |                                               |                   |        |    |   |                                                                                  |                                                              |
|------------|-----------------------------------------------|-------------------|--------|----|---|----------------------------------------------------------------------------------|--------------------------------------------------------------|
|            | Prealbumin                                    | PA                | 17,721 | 7  | 7 | GCKR, RGS12,<br>chr11:67562271, HNF1A-<br>AS1, LINC01229, TTR,<br>chr20:40555309 | GCKR, RGS12, HNF1A-AS1,<br>LINC01229, TTR,<br>chr20:40555309 |
|            | Total bilirubin                               | TBIL              | 17,721 | 3  | 0 | None                                                                             | None                                                         |
|            | γ-glutamyl transferase                        | GGT               | 17,721 | 10 | 3 | DYNC2L1, ABCB4, AUH                                                              | ABCB4                                                        |
| Metabolism | Hemoglobin A1c                                | HbA1C             | 2,008  | 0  | 0 | None                                                                             | None                                                         |
|            | Vitamin D                                     | Vit D             | 3,091  | 1  | 0 |                                                                                  |                                                              |
|            | Oral glucose tolerance test-2<br>hour         | OGTT2h            | 14,760 | 4  | 4 | CDKAL1, chr9:4291435,<br>chr10:69215297, MTNR1B                                  | CDKAL1, chr9:4291435,<br>MTNR1B                              |
|            | Oral glucose tolerance test-1<br>hour         | OGTT1h            | 14,790 | 5  | 5 | CDKAL1, chr7:128212012,<br>chr9:4307369, KIF11,<br>MTNR1B                        | CDKAL1, KIF11, MTNR1B                                        |
|            | Oral glucose tolerance test-<br>fasting       | OGTT0h            | 14,889 | 9  | 1 | ESR1                                                                             | None                                                         |
|            | Blood glucose                                 | GLU               | 15,124 | 8  | 0 | None                                                                             | None                                                         |
| Protein    | Ferritin                                      | Ferr              | 9,374  | 1  | 1 | chr18:14735484                                                                   | None                                                         |
|            | Albumin                                       | ALB               | 17,721 | 1  | 0 | None                                                                             | None                                                         |
|            | Albumin/globulin ratio                        | AGR               | 17,721 | 6  | 1 | chr14:105508504                                                                  | chr14:105508504                                              |
|            | Globulin                                      | GLB               | 17,721 | 8  | 4 | ELL2, chr14:105508522,<br>FXR2, BCL2                                             | chr14:105508522, FXR2                                        |
|            | Total protein                                 | TP                | 17,721 | 3  | 0 | None                                                                             | None                                                         |
| Urinalysis | Casts in urine                                | CAST_U            | 18,655 | 0  | 0 | None                                                                             | None                                                         |
|            | Epithelial cell count in urine                | EC_U              | 18,655 | 0  | 0 | None                                                                             | None                                                         |
|            | Urine conductivity                            | Cond              | 18,655 | 0  | 0 | None                                                                             | None                                                         |
|            | Crystals in Urine                             | XTAL_U            | 18,656 | 0  | 0 | None                                                                             | None                                                         |
|            | Lysed red blood cell<br>percentage in urine   | Lysed RBC(%)      | 18,656 | 0  | 0 | None                                                                             | None                                                         |
|            | Small round epithelial cells in<br>urine      | SRC_U             | 18,656 | 1  | 1 | chr2:185847594                                                                   | None                                                         |
|            | Unlysed red blood cell<br>percentage in urine | Unlysed<br>RBC(%) | 18,656 | 0  | 0 | None                                                                             | None                                                         |
|            | Urinary tract infection                       | UTI               | 18,656 | 0  | 0 | None                                                                             | None                                                         |
|            | Protein in urine                              | PRO               | 18,711 | 0  | 0 | None                                                                             | None                                                         |
|            | Bacteria count in urine                       | BACT_U            | 18,714 | 0  | 0 | None                                                                             | None                                                         |
|            | Bilirubin in urine                            | BIL               | 18,714 | 0  | 0 | None                                                                             | None                                                         |
|            | Blood in urine                                | BLD               | 18,714 | 1  | 1 | chr16:58057133                                                                   | None                                                         |
|            | Ketones in urine                              | KET               | 18,714 | 0  | 0 | None                                                                             | None                                                         |
|            | Leukocytes esterase in urine                  | LEU               | 18,714 | 0  | 0 | None                                                                             | None                                                         |
|            | Nitrites in urine                             | NT                | 18,714 | 1  | 1 | chr21:23745039                                                                   | chr21:23745039                                               |
|            | Red blood cell count in urine                 | RBC_U             | 18,714 | 0  | 0 | None                                                                             | None                                                         |
|            | Urine clarity                                 | Clarity           | 18,714 | 0  | 0 | None                                                                             | None                                                         |
|            | Urine glucose                                 | GLU_U             | 18,714 | 2  | 1 | FBXL20                                                                           | FBXL20                                                       |
|            | Urine PH level                                | pH                | 18,714 | 2  | 0 | None                                                                             | None                                                         |
|            | Urine specific gravity                        | SG                | 18,714 | 0  | 0 | None                                                                             | None                                                         |
|            | Urobilinogen                                  | UBG               | 18,714 | 1  | 1 | SLCO1B3                                                                          | SLCO1B3                                                      |
|            | White blood cell count in<br>urine            | WBC_U             | 18,714 | 1  | 1 | SLC10A7                                                                          | None                                                         |
|            | Fibers in urine                               | FIBERS            | 18,715 | 1  | 1 | PDILT                                                                            | PDILT                                                        |
|            | Yeast-like cell in urine                      | YLC               | 18,715 | 0  | 0 | None                                                                             | None                                                         |

## **Supplementary Figures:**

**Supplementary Figure S1.** The number of available samples for each trait

**Supplementary Figure S2.** The visualization of trait distribution and pairwise association

**Supplementary Figure S3.** The Manhattan plots of all studied traits

**Supplementary Figure S4.** The heatmap of partitioning heritability results

**Supplementary Figure S5.** The results of partitioning heritability for traits that were not listed in the main text

**Supplementary Figure S6.** The genetic colocalization analysis of trait pairs that were not listed in the main text
